# 1 The protein translation machinery is expressed for maximal 2 efficiency in *Escherichia coli*

3  
4 Xiao-Pan Hu<sup>1</sup>, Hugo Dourado<sup>1</sup>, Martin J. Lercher<sup>1,\*</sup>

5  
6 <sup>1</sup> Institute for Computer Science and Department of Biology,  
7 Heinrich Heine University, D-40225 Düsseldorf, Germany.

8 \* Correspondence to: [martin.lercher@hhu.de](mailto:martin.lercher@hhu.de)

## 9 Abstract

10 Protein synthesis is the most expensive process in fast-growing bacteria<sup>1,2</sup>. The economic  
11 aspects of protein synthesis at the cellular level have been investigated by estimating  
12 ribosome activity<sup>3-5</sup> and the expression of ribosomes<sup>3,6</sup>, tRNA<sup>7-9</sup>, mRNA<sup>2</sup>, and elongation  
13 factors<sup>10,11</sup>. The observed growth-rate dependencies form the basis of powerful  
14 phenomenological bacterial growth laws<sup>5,12-16</sup>; however, a quantitative theory allowing us to  
15 understand these phenomena on the basis of fundamental biophysical and biochemical  
16 principles is currently lacking. Here, we show that the observed growth-rate dependence of  
17 the concentrations of ribosomes, tRNAs, mRNA, and elongation factors in *Escherichia coli*  
18 can be predicted accurately by minimizing cellular costs in a detailed mathematical model of  
19 protein translation; the mechanistic model is only constrained by the physicochemical  
20 properties of the molecules and requires no parameter fitting. We approximate the costs of  
21 molecule species through their masses, justified by the observation that cellular dry mass  
22 per volume is roughly constant across growth rates<sup>17</sup> and hence represents a limited  
23 resource. Our results also account quantitatively for observed RNA/protein ratios and  
24 ribosome activities in *E. coli* across diverse growth conditions, including antibiotic stresses.  
25 Our prediction of active and free ribosome abundance facilitates an estimate of the  
26 deactivated ribosome reserve<sup>14,18,19</sup>, which reaches almost 50% at the lowest growth rates.  
27 We conclude that the growth rate dependent composition of *E. coli*'s protein synthesis  
28 machinery is a consequence of natural selection for minimal total cost under  
29 physicochemical constraints, a paradigm that might generally be applied to the analysis of  
30 resource allocation in complex biological systems.

## 31 Introduction

32 Protein translation is central to the self-replication of biological cells. It is the energetically  
33 most expensive process in fast growing *E. coli* cells, accounting for up to 50% of the  
34 proteome<sup>2</sup> and 2/3 of cellular ATP consumption<sup>1</sup>. It is likely that natural selection acted to  
35 optimize the efficiency of this central process. But what exactly is "efficiency" in the  
36 evolutionary context? In the late 1950s, it was hypothesized that ribosomes operate at a  
37 constant, maximal rate<sup>3,4</sup>, consistent with the observed linear dependence of ribosome  
38 concentration on growth rate<sup>3,12,20,21</sup>. This hypothesis was later proven untenable, as the  
39 activity of ribosomes was observed to increase with growth rate<sup>8</sup>. Klumpp *et al.*<sup>5</sup> suggested  
40 that optimal translational efficiency corresponds to the parsimonious usage of translation-  
41 associated proteins, most notably ribosomal proteins, elongation factor Tu, and tRNA  
42 synthetases. While these authors were able to fit a coarse-grained phenomenological model

43 to the data, their suggested evolutionary objective could also not explain the observed  
44 growth rate dependencies quantitatively (see **Supplementary Notes 1** for a discussion of  
45 Ref. <sup>5</sup>). Thus, it is currently unclear to what extent translation has indeed been optimized by  
46 natural selection, and – if such optimization indeed occurred – whether its action can be  
47 expressed in terms of a simple objective function.

48 Here, we propose an entirely different evolutionary objective, based on the experimental  
49 observation that cellular dry mass per cell volume is approximately constant across  
50 environments and growth rates in *E. coli*<sup>17</sup>, as is the total mass concentration in the cytosol<sup>22</sup>.  
51 If the cell allocates more of this limited mass concentration “budget” to one particular  
52 process, less is available to other processes. The upper bound for the cytosolic mass  
53 concentration, beyond which diffusion becomes inefficient, is a fundamental constraint on  
54 cellular growth<sup>23,24</sup>, and we thus use the cytosolic mass concentration of a particular  
55 molecule type as an approximation to its cost.

56 We hypothesize that to maximize the *E. coli* growth rate in a given environment, natural  
57 selection minimizes the total cost of translation components utilized to achieve the required  
58 protein production rate. An analogous optimality principle has been used to understand the  
59 relationship between enzyme and substrate concentrations, explaining the scaling of *E. coli*  
60 proteome sectors with growth rate<sup>34</sup>. We emphasize that the optimal efficiency of the  
61 translation machinery is not based on the maximization of ribosome activity, but on the  
62 minimization of the combined cost of the complete translation machinery at a given protein  
63 production rate.

## 64 **Results and Discussion**

65 To test our hypothesis, we constructed a translation model consisting of 276 biochemical  
66 reactions, including 119 reactions with non-linear kinetics (**Fig. 1**; for details see Methods).  
67 This mechanistic model accounts for the concentrations of mRNA, the ribosome, the  
68 different charged tRNAs, and the elongation factors Ts (EF-Ts) and Tu (EF-Tu). We fully  
69 parameterized the model with molecular masses and kinetic constants measured  
70 experimentally<sup>25–27</sup>; the only exceptions are the initiation parameters, which were  
71 previously estimated from gene expression data<sup>25</sup>, and the ribosomal Michaelis constant for  
72 the ternary complexes, which was estimated based on the diffusion limit<sup>5</sup> and hence  
73 represents a lower bound. The model is based purely on biochemical and biophysical  
74 considerations; it contains no free parameters for fitting, nor does it include any explicit  
75 growth-rate dependencies. For *E. coli* growing under different experimental conditions, we  
76 used measured growth rates and protein concentrations<sup>28</sup> to determine the required  
77 translation rate and the proportions of the different amino acids incorporated into the  
78 elongating proteins. At this required protein production rate, we minimized the combined  
79 cost of the translation machinery in our model, treating the concentrations of all  
80 components as free variables; the values of individual reaction fluxes result deterministically  
81 from these concentrations according to the respective rate laws (**Methods**).

82 We first compared our predictions to experimental data for exponentially growing *E. coli* in  
83 different conditions<sup>7–9,28,29</sup> (see **Fig. 2** for growth in a glucose-limited chemostat at growth  
84 rate  $\mu = 0.35 \text{ h}^{-1}$ ; for other conditions, see **Extended Data Fig. 1**). The mechanistic model  
85 accurately predicts the absolute concentrations of ribosomes, EF-Tu, EF-Ts, mRNA, and total  
86 tRNA in each condition. Predictions for individual tRNA concentrations are less accurate but  
87 are still mostly within a 2-fold error (**Fig. 2, Extended Data Fig. 1**); the discrepancies may be

88 due to the simplifying assumption of a single ribosomal Michaelis constant  $K_m$  for all tRNA  
89 types<sup>5</sup>.

90 We next tested if this systems-level view on the total cost of translation explains the  
91 observed growth rate-dependencies of the expression of translation machinery  
92 components<sup>7-9,14,28</sup>, of the elongation rate<sup>14</sup>, and of the RNA/protein ratio<sup>12,14</sup>, considering  
93 experimental data across 20 diverse conditions (14 minimal media, including 3 stress  
94 conditions; 4 chemostats; and 2 rich media)<sup>28</sup>. The predicted concentrations of ribosomes,  
95 EF-Tu, and EF-Ts increase with growth rate in line with experimental observations (**Fig. 3**). At  
96 low growth rates ( $\mu < 0.3 \text{ h}^{-1}$ ; **Fig. 3a**), observed ribosome concentrations exceed those  
97 predicted from cost minimization, a deviation consistent with a substantial reserve of  
98 deactivated ribosomes at low growth rates<sup>14</sup>. Such deactivated ribosomes may provide  
99 fitness benefits in changing environments<sup>18,19</sup>, but cannot be optimally efficient in a constant  
100 environment and thus cannot be predicted by our optimization strategy.

101 To allow a meaningful comparison between predictions and experiment, we thus estimated  
102 the experimental concentration of ribosomes actively involved in elongation (**Methods**).  
103 Cost minimization predicts these experimental estimates with high accuracy across the full  
104 range of assayed growth rates; observed values deviate from predictions on average by 11%  
105 (**Fig. 3b**).

106 The remaining, non-active ribosome fraction comprises two parts: the deactivated ribosome  
107 reserve currently unavailable for translation<sup>14</sup>, and free, potentially active ribosomes not  
108 currently bound to mRNA (see **Supplementary Note 2** for the nomenclature on ribosome  
109 states). As our model quantifies the abundance of both active and free ribosomes, their  
110 subtraction from observed total ribosome concentrations provides an estimate of the  
111 deactivated ribosome reserve as a function of growth rate (**Fig. 4**). While this reserve makes  
112 up less than 20% of total ribosomes at moderate to fast growth, it reaches almost 50% at the  
113 lowest growth rate assayed in Ref.<sup>28</sup>.

114 The predicted absolute abundances of EF-Tu (**Fig. 3c**), EF-Ts (**Fig. 3d**), and mRNA (**Extended**  
115 **Data Fig. 2a**) also account quantitatively for the experimental data<sup>7-9,28,29</sup>, with average  
116 deviations  $\leq 21\%$  in each case. At low growth rates, experimentally observed concentrations  
117 of EF-Tu (**Fig. 3c**) and tRNA (**Extended Data Fig. 2b**) are higher than predicted. The model  
118 only includes charged (aminoacyl-) tRNA concentrations, and it is likely that the unknown  
119 fraction of uncharged tRNA explains at least part of this deviation.

120 A linear correlation between the RNA/protein ratio and growth rate was discovered in the  
121 1950s<sup>3,20,21,30</sup> and forms the basis of phenomenological bacterial growth laws<sup>5,12,14</sup>. Relating  
122 the predicted total RNA (ribosomal RNA + tRNA + mRNA) with measured protein  
123 concentrations<sup>28</sup> indeed results in a near-linear relationship, accurately matching observed  
124 values at high to intermediate growth rates ( $\mu > 0.3 \text{ h}^{-1}$ ; **Fig. 5a**). At lower growth rates,  
125 model predictions are slightly too low, likely because of the deactivated ribosome reserve<sup>14</sup>  
126 (**Fig. 4**). At low growth rates ( $\mu = 0.12 \text{ h}^{-1}$ ), RNA and proteins allocated to an optimally  
127 efficient translation machinery (including deactivated ribosomes) account for 12% of total  
128 dry mass, rising almost linearly to  $\sim 45\%$  at high growth rates ( $\mu = 1.9 \text{ h}^{-1}$ ; **Extended Data Fig.**  
129 **3**).

130 The concentrations of the individual components of the translation machinery determine  
131 the average translation elongation rate (ribosomal activity), defined as the total cellular

132 translation rate divided by the total active ribosome content<sup>19</sup>. The predicted elongation  
133 rates closely match the experimental data<sup>14</sup> over a broad range of growth rates (**Fig. 5b**).

134 The expression of *E. coli*'s translation machinery reacts strongly to the exposure to  
135 antibiotics that inhibit the ribosome, such as chloramphenicol<sup>12,14,15</sup>. The details of these  
136 changes can also be understood from our hypothesis of cost minimization. The  
137 concentrations of ribosomes and EF-Tu, the RNA/protein ratio, and the elongation rate of  
138 active ribosomes increase under chloramphenicol stress (**Extended Data Fig. 4**); these  
139 changes partially compensate for the reduced fraction of active ribosomes. The  
140 concentration of EF-Ts instead decreases with increasing chloramphenicol concentration  
141 (**Extended Data Fig. 4c**). EF-Ts contributes to translation by converting EF-Tu·GDP to EF-  
142 Tu·GTP, which then forms a ternary complex with charged tRNA. Under chloramphenicol  
143 stress, fewer ternary complexes are turned over, and hence less EF-Ts is needed.

144 In sum, cost minimization in a mechanistic bottom-up model of optimal translation  
145 efficiency, fully parameterized with known kinetic constants and molecular masses, accounts  
146 quantitatively for the concentrations of all molecule species involved. The optimal  
147 concentrations of different components change differentially with growth rate, explaining  
148 the observed scaling of *E. coli*'s translation machinery composition, RNA composition, and  
149 elongation rate. We conclude that *E. coli*'s translation machinery works close to optimal  
150 efficiency in terms of the fraction of total dry mass it occupies. This fraction comprises all  
151 molecule species involved in translation, not only the protein part as suggested earlier<sup>5,31</sup>.  
152 Our results further support the idea that phenomenological growth laws of proteome  
153 composition<sup>5,12,14,15</sup> may have their root in the costs associated with the non-protein  
154 molecules involved in particular processes, and that their explicit inclusion in systems  
155 biology models of cellular growth<sup>5,25,32,33</sup> may eventually allow these models to abandon any  
156 reliance on phenomenological parameters.

## 157 **References**

- 158 1. Russell, J. B. & Cook, G. M. Energetics of bacterial growth: balance of anabolic and  
159 catabolic reactions. *Microbiol. Rev.* **59**, 48–62 (1995).
- 160 2. Bremer, H. & Dennis, P. P. Modulation of Chemical Composition and Other  
161 Parameters of the Cell at Different Exponential Growth Rates. *EcoSal Plus* **3**, 765–77  
162 (2008).
- 163 3. Schaechter, M., Maaløe, O. & Kjeldgaard, N. O. Dependency on Medium and  
164 Temperature of Cell Size and Chemical Composition during Balanced Growth of  
165 *Salmonella typhimurium*. *J. Gen. Microbiol.* **19**, 592–606 (1958).
- 166 4. Koch, A. L. Why can't a cell grow infinitely fast? *Can. J. Microbiol.* **34**, 421–426 (1988).
- 167 5. Klumpp, S., Scott, M., Pedersen, S. & Hwa, T. Molecular crowding limits translation  
168 and cell growth. *Proc. Natl. Acad. Sci. U. S. A.* **110**, 16754–9 (2013).
- 169 6. Ecker, R. E. & Schaechter, M. Ribosome content and the rate of growth of salmonella  
170 typhimurium. *Biochim. Biophys. Acta* **76**, 275–9 (1963).
- 171 7. Skjold, A. C., Juarez, H. & Hedgcoth, C. Relationships among deoxyribonucleic acid,  
172 ribonucleic acid, and specific transfer ribonucleic acids in *Escherichia coli* 15T- at  
173 various growth rates. *J. Bacteriol.* **115**, 177–187 (1973).
- 174 8. Forchhammer, J. & Lindahl, L. Growth rate of polypeptide chains as a function of the  
175 cell growth rate in a mutant of *Escherichia coli* 15. *J. Mol. Biol.* **55**, 563–8 (1971).
- 176 9. Dong, H., Nilsson, L. & Kurland, C. G. Co-variation of tRNA Abundance and Codon  
177 Usage in *Escherichia coli* at Different Growth Rates. *J. Mol. Biol.* **260**, 649–663 (1996).
- 178 10. Miyajima, A. & Kaziro, Y. Coordination of levels of elongation factors Tu, Ts, and G,  
179 and ribosomal protein S1 in *Escherichia coli*. *J. Biochem.* **83**, 453–462 (1978).
- 180 11. Furano, A. V. Content of elongation factor Tu in *Escherichia coli*. *Proc. Natl. Acad. Sci.*  
181 **72**, 4780–4784 (1975).
- 182 12. Scott, M., Gunderson, C. W., Mateescu, E. M., Zhang, Z. & Hwa, T. Interdependence  
183 of cell growth and gene expression: origins and consequences. *Science* **330**, 1099–102  
184 (2010).
- 185 13. Klumpp, S., Zhang, Z. & Hwa, T. Growth Rate-Dependent Global Effects on Gene  
186 Expression in Bacteria. *Cell* **139**, 1366–1375 (2009).
- 187 14. Dai, X. *et al.* Reduction of translating ribosomes enables *Escherichia coli* to maintain  
188 elongation rates during slow growth. *Nat. Microbiol.* **2**, 16231 (2016).
- 189 15. Hui, S. *et al.* Quantitative proteomic analysis reveals a simple strategy of global  
190 resource allocation in bacteria. *Mol. Syst. Biol.* **11**, 784 (2015).
- 191 16. You, C. *et al.* Coordination of bacterial proteome with metabolism by cyclic AMP  
192 signalling. *Nature* **500**, 301–306 (2013).
- 193 17. Nanninga, N. & Woldringh, C. Cell growth, genome duplication and cell division in  
194 *Escherichia coli*. in *Molecular Cytology of Escherichia coli* (ed. Nanninga, N.) 259–318  
195 (Academic Press, 1985).
- 196 18. Mori, M., Schink, S., Erickson, D. W., Gerland, U. & Hwa, T. Quantifying the benefit of  
197 a proteome reserve in fluctuating environments. *Nat. Commun.* **8**, 1–8 (2017).

- 198 19. Erickson, D. W. *et al.* A global resource allocation strategy governs growth transition  
199 kinetics of *Escherichia coli*. *Nature* **551**, 119–123 (2017).
- 200 20. Neidhardt, F. C. & Magasanik, B. Studies on the role of ribonucleic acid in the growth  
201 of bacteria. *Biochim. Biophys. Acta* **42**, 99–116 (1960).
- 202 21. Maaløe, O. Regulation of the Protein-Synthesizing Machinery—Ribosomes, tRNA,  
203 Factors, and So On. in *Biological Regulation and Development* 487–542 (Springer US,  
204 1979). doi:10.1007/978-1-4684-3417-0\_12
- 205 22. Kubitschek, H. E., Baldwin, W. W., Schroeter, S. J. & Graetzer, R. Independence of  
206 buoyant cell density and growth rate in *Escherichia coli*. *J. Bacteriol.* **158**, 296–9  
207 (1984).
- 208 23. Atkinson, D. E. Limitation of Metabolite Concentrations and the Conservation of  
209 Solvent Capacity in the Living Cell. *Curr. Top. Cell. Regul.* **1**, 29–43 (1969).
- 210 24. Beg, Q. K. *et al.* Intracellular crowding defines the mode and sequence of substrate  
211 uptake by *Escherichia coli* and constrains its metabolic activity. *Proc. Natl. Acad. Sci.*  
212 *U. S. A.* **104**, 12663–12668 (2007).
- 213 25. Tadmor, A. D. & Tlusty, T. A coarse-grained biophysical model of *E. coli* and its  
214 application to perturbation of the rRNA operon copy number. *PLoS Comput. Biol.* **4**,  
215 e1000038 (2008).
- 216 26. Gromadski, K. B., Wieden, H.-J. & Rodnina, M. V. Kinetic mechanism of elongation  
217 factor Ts-catalyzed nucleotide exchange in elongation factor Tu. *Biochemistry* **41**,  
218 162–9 (2002).
- 219 27. Louie, A. & Jurnak, F. Kinetic studies of *Escherichia coli* elongation factor Tu-  
220 guanosine 5'-triphosphate-aminoacyl-tRNA complexes. *Biochemistry* **24**, 6433–9  
221 (1985).
- 222 28. Schmidt, A. *et al.* The quantitative and condition-dependent *Escherichia coli*  
223 proteome. *Nat. Biotechnol.* **34**, 104–110 (2016).
- 224 29. Valgepea, K., Adamberg, K., Seiman, A. & Vilu, R. *Escherichia coli* achieves faster  
225 growth by increasing catalytic and translation rates of proteins. *Mol. Biosyst.* **9**, 2344  
226 (2013).
- 227 30. Dennis, P. P. & Bremer, H. Differential rate of ribosomal protein synthesis in  
228 *Escherichia coli* B/r. *J. Mol. Biol.* **84**, 407–422 (1974).
- 229 31. Ehrenberg, M. & Kurland, C. G. Costs of Accuracy Determined by a Maximal Growth  
230 Rate Constraint. *Q. Rev. Biophys.* **17**, 45–82 (1984).
- 231 32. O'Brien, E. J., Lerman, J. a, Chang, R. L., Hyduke, D. R. & Palsson, B. Ø. Genome-scale  
232 models of metabolism and gene expression extend and refine growth phenotype  
233 prediction. *Mol. Syst. Biol.* **9**, 693 (2013).
- 234 33. Goelzer, A. *et al.* Quantitative prediction of genome-wide resource allocation in  
235 bacteria. *Metab. Eng.* **32**, 232–243 (2015).
- 236 34. Dourado, H., Maurino, V.G. & Lercher, M. J. Enzymes and Substrates Are Balanced at  
237 Minimal Combined Mass Concentration in vivo. *bioRxiv* 128009; doi:  
238 <https://doi.org/10.1101/128009>

240 **Endnotes**

241 **Acknowledgments:**

242 This work was supported by the German Research Foundation (DFG grants IRTG 1515  
243 supporting HD; EXC 1028, CRC 680, and CRC 1310 to MJL). We thank Matteo Mori and  
244 Terrence Hwa for helpful discussions.

245 **Author Contributions:**

246 HD conceived of the study. XPH developed and implemented the model and performed the  
247 analyses. MJL supervised the study. XPH and MJL interpreted the results and wrote the  
248 manuscript.

249 The authors declare that they have no competing interests.

250 Correspondence and requests for materials should be addressed to [martin.lercher@hhu.de](mailto:martin.lercher@hhu.de).

251 **Figures**

252

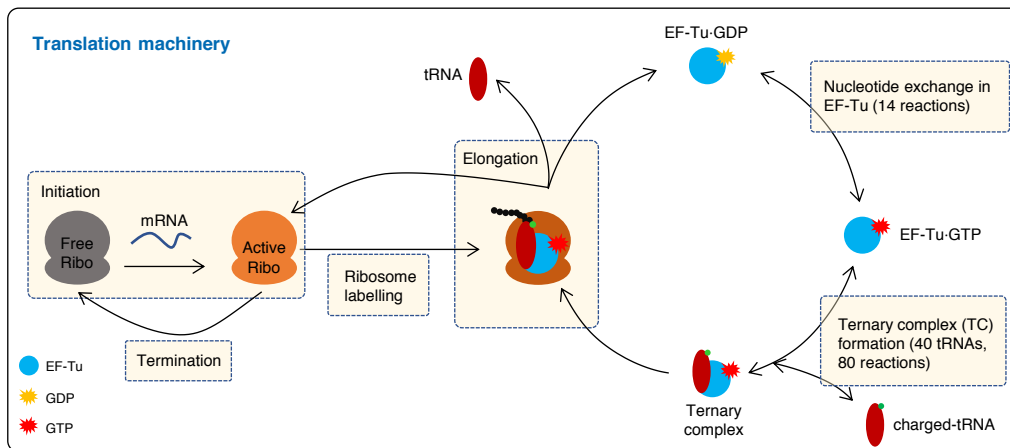

253

254 **Figure 1.** Schematic overview of the translation model. Translation initiation converts  
255 the free ribosome to active ribosome by combining it with mRNA. Next, the active  
256 ribosome enters elongation, and the codon label is added to limit translation to the  
257 cognate ternary complex (TC). The codon-labeled ribosome catalyzes the new peptide  
258 bond formation with the TC (EF-Tu·GTP·aa-tRNA) as substrate. EF-Tu·GDP and free  
259 tRNA are released after the formation of peptide bond. At the same time with peptide  
260 bond formation, the codon labeled ribosome is re-converted to active ribosome,  
261 which will be labeled again for the next round of elongation or will go to termination.  
262 EF-Tu·GDP is converted to EF-Tu·GTP with the help of EF-Ts. Next, EF-Tu·GTP binds  
263 with the charged tRNA (aa-tRNA) to form TC, which is fed into the next round of  
264 elongation. Ribosome states are indicated by color: grey=free ribosome; orange=  
265 active ribosome; brown=active ribosome with codon label.

266



267

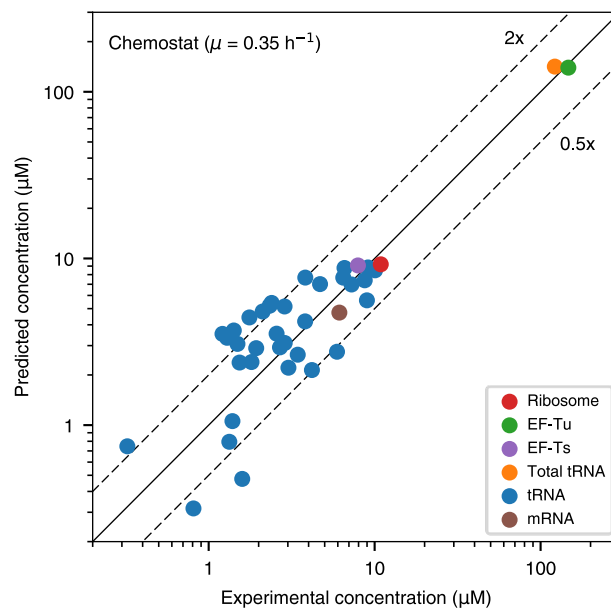

268

269 **Figure 2.** Optimal concentrations of the translation machinery components agree with  
270 experimentally measured concentrations in a glucose-limited chemostat ( $\mu = 0.35 \text{ h}^{-1}$ ;  
271 for other conditions, see **Extended Data Fig. 1**). The solid line shows the expected  
272 identity, whereas the upper and lower dashed lines show prediction errors of 2x and  
273 0.5x, respectively. Predictions for ribosome, EF-Tu, EF-Ts, mRNA, and total tRNA are  
274 highly accurate, with Pearson's  $R^2 = 0.99$  and geometric mean fold-error  $GMFE = 1.16$ ,  
275 *i.e.*, predictions based purely on a physico-chemical model and the assumption of cost  
276 minimization are on average 16% off. Predictions for individual tRNA species are  
277 somewhat less accurate, with  $GMFE = 1.68$ . Experimentally determined  
278 concentrations of the ribosome (averaged over all ribosomal proteins), EF-Tu, and EF-  
279 Ts are from Ref. <sup>28</sup>. mRNA <sup>29</sup> and tRNA <sup>9</sup> concentrations are interpolated values based  
280 on growth rates.

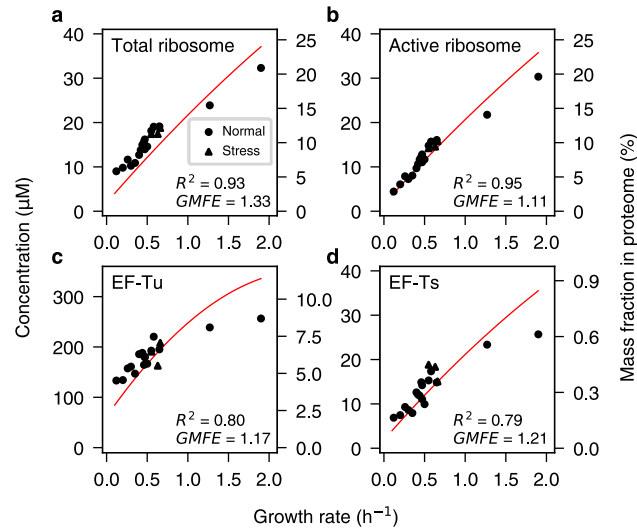

281

282 **Figure 3.** The growth rate dependence of the concentrations of translation machinery  
283 components<sup>28</sup> is consistent between predictions (red lines) and experimental  
284 observations. **(a)** Total ribosome concentration (arithmetic means across ribosomal  
285 proteins). **(b)** Actively elongating ribosomes, estimated from data in panel (a)  
286 according to Ref. <sup>14</sup> (see **Methods**), with  $R^2 = 0.95$  and  $GMFE = 1.11$ . **(c)** EF-Tu,  $R^2 =$   
287  $0.80$ ,  $GMFE = 1.17$ . **(d)** EF-Ts,  $R^2 = 0.79$ ,  $GMFE = 1.21$ . Circles indicate normal  
288 conditions, triangles indicate stress conditions.

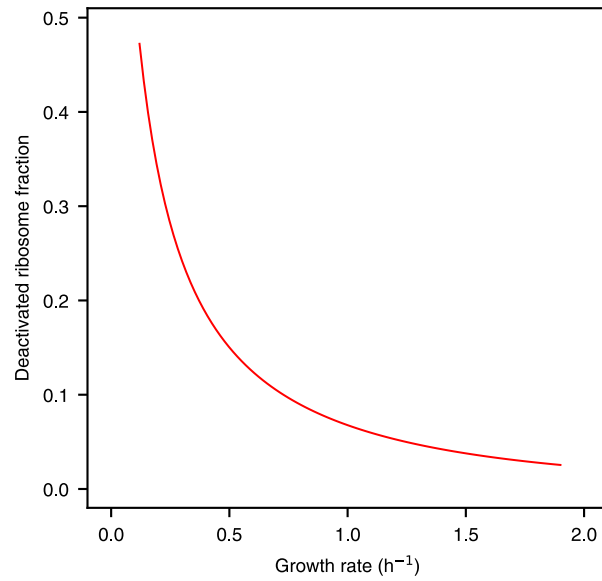

289

290 **Figure 4.** The estimated fraction of deactivated ribosomes increases sharply with  
291 decreasing growth rate, reaching almost 50% for the lowest growth rate assayed in  
292 Ref. <sup>28</sup> and rapidly dropping towards zero at higher growth rates.

293

294

295

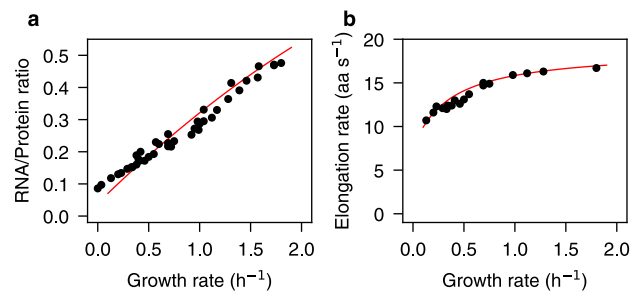

296

297 **Figure 5.** The growth rate dependences of the total RNA/protein ratio and ribosome  
298 activity are consequences of translation machinery cost minimization. **(a)** Predicted  
299 total RNA concentration (mRNA + tRNA + rRNA) relative to observed total protein  
300 concentration at different cellular growth rates (red line) compared to experimental  
301 observations<sup>12,14</sup>;  $R^2 = 0.97$ ,  $GMFE = 1.10$ . **(b)** Predicted (red line) and experimentally  
302 determined<sup>14</sup> elongation rates of actively translating ribosomes (ribosome activities);  
303  $R^2 = 0.93$ ,  $GMFE = 1.03$ . At the lowest assayed growth rates, non-growth related  
304 translation – which is not included in the model – may become comparable to growth-  
305 related translation; at these growth rates, the numerical optimization of our model  
306 did not converge, and thus the red lines are not extended into this region.

307 **Extended Data Figures**

308

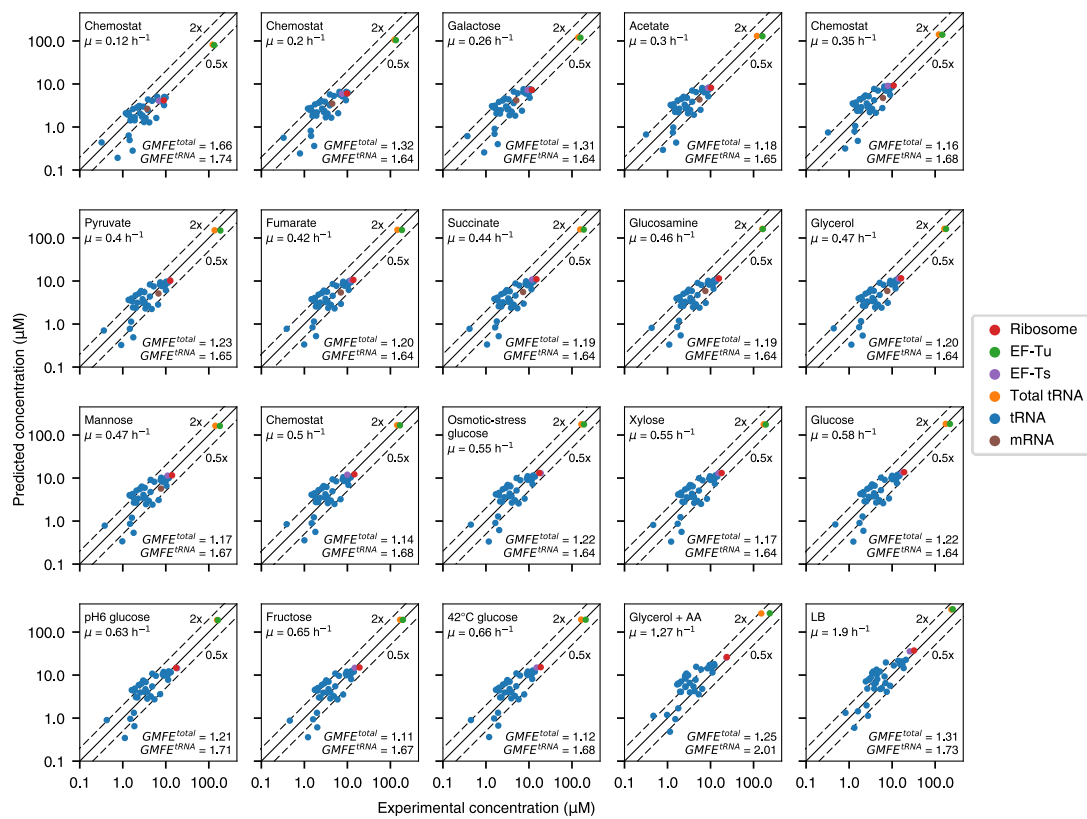

309

310 **Extended Data Figure 1.** Translation machinery at optimal state at 20 growth conditions on  
 311 different media and in chemostats with a minimal glucose medium, sorted by ascending  
 312 growth rate. The conditions are those under which protein concentrations were measured in  
 313 Ref. <sup>28</sup>. mRNA <sup>29</sup> and tRNA <sup>9</sup> were assayed at different growth rates; in order to compare all  
 314 data at the same growth rates, we chose the growth rate at which protein concentrations  
 315 (ribosome, EF-Tu, EF-Ts) were measured as the reference and used quadratic regression  
 316 models across the available data to estimate corresponding mRNA and tRNA concentrations.  
 317 As absolute mRNA concentration is only available from low to intermediate growth rates  
 318 (0.11 to 0.49)<sup>29</sup>, we did not attempt to infer mRNA concentration outside of this range.

319

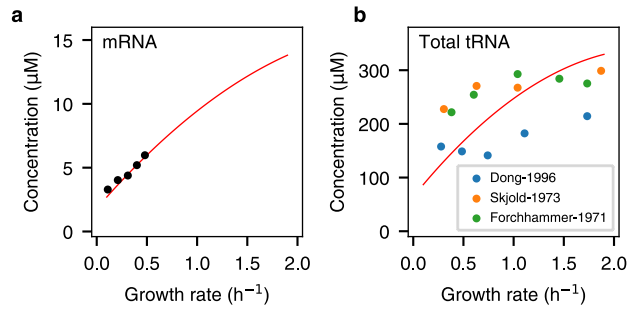

320

321 **Extended Data Figure 2.** The concentrations of the major non-ribosomal RNA pools  
322 predicted from cost minimization are consistent with experimental observations. **(a)** mRNA  
323 <sup>29</sup>,  $R^2 = 0.97$ ,  $GMFE = 1.06$ . **(b)** Total tRNA data from Dong *et al.* <sup>9</sup> (summed over individual  
324 tRNAs), Forchhammer *et al.* <sup>8</sup>, and Skjold *et al.* <sup>7</sup>; combined  $R^2 = 0.27$ ,  $GMFE = 1.30$ .

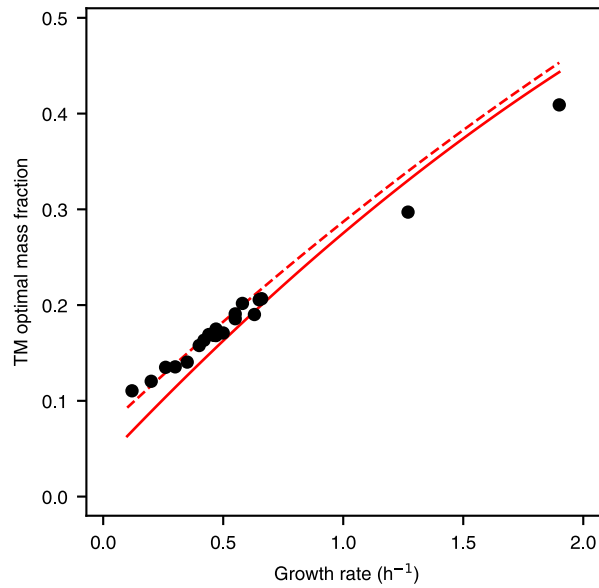

325

326 **Extended Data Figure 3.** Theoretically optimal resource allocation to the translation  
327 machinery as a fraction of total dry mass increases almost linearly with growth rate. The  
328 solid red line indicates the model predictions, without accounting for deactivated ribosomes.  
329 The dashed line indicates the predicted optimal mass fraction when we additionally include  
330 the fraction of deactivated ribosomes, which cannot be predicted by a steady-state model  
331 but which we estimated from experimental observations (see Methods for details).  
332 Experimental data (points) sums the observed concentrations of translation associated  
333 proteins<sup>28</sup> (ribosomal proteins, EF-Tu, EF-Ts) and RNA<sup>12,14</sup> (ribosomal RNA, tRNA, mRNA;  
334 interpolated to the same growth rates as in the protein measurements, see Methods). Note  
335 that the mass fraction of the translation machinery does not include GDP, GTP, free tRNA,  
336 tRNA-synthetases, and elongation factor G (*fusA*). Mass fractions are calculated based on the  
337 assumption of a constant proteome mass fraction of 50% of the total dry mass. Some  
338 experimental data shows that the mass fraction of protein in total dry weight decreases  
339 slightly with growth rate<sup>19,29</sup>, and thus at high growth rates the translation machinery mass  
340 fraction may be slightly lower than shown.

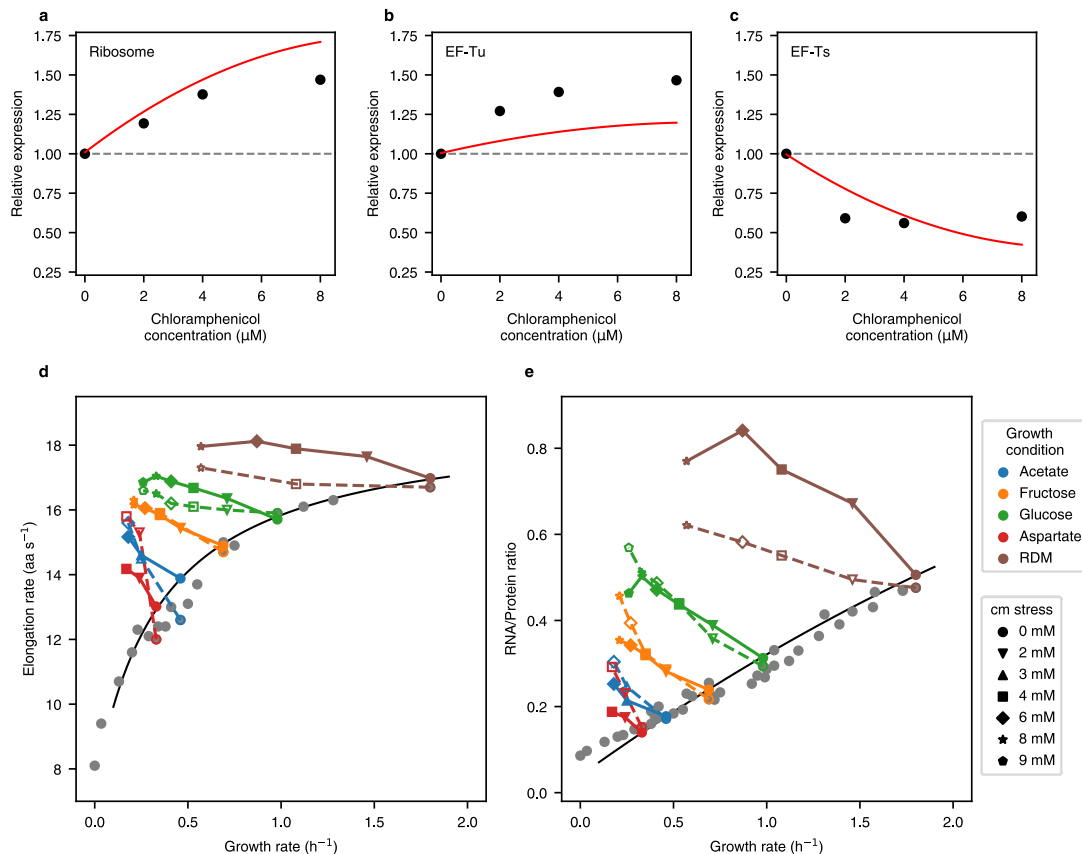

341

342 **Extended Data Figure 4.** Optimality of the translation machinery under  
343 chloramphenicol stress. Model predictions (red lines) of relative changes in the  
344 concentrations of (a) ribosome, (b) EF-Tu, and (c) EF-Ts under increasing  
345 chloramphenicol stress are qualitatively consistent with experimental data<sup>15</sup>.  
346 Predicted (d) elongation rates and (e) RNA/protein ratios under chloramphenicol  
347 stress are also qualitatively consistent with experimental data<sup>14</sup>. Grey dots indicate  
348 experimental elongation rates without chloramphenicol stress; the black line marks  
349 the corresponding (non-stressed) predictions. Different symbols indicate varying  
350 chloramphenicol concentrations, while colours indicate growth conditions (different  
351 nutrients). Dashed lines connect experimental elongation rates (open symbols) under  
352 chloramphenicol stress on the same nutrient; solid lines connect the corresponding  
353 elongation rate predictions (filled symbols). Chloramphenicol concentrations were  
354 varied from 0mM to 9mM. In both predictions and experiment, elongation rates  
355 increase with growing chloramphenicol stress, with faster increases under  
356 progressively poorer nutrient conditions. The overestimated RNA/protein ratio on rich  
357 defined medium (RDM) likely reflects the fact that ribosome is inhibited less by  
358 chloramphenicol *in vivo* than theoretical calculations predict (see Fig. N1 in Ref.<sup>14</sup>).  
359 The predictions are functions of the growth rate and of chloramphenicol  
360 concentration; the non-smoothness of the prediction lines likely arise from  
361 experimental uncertainties in the corresponding values.
